# Supplementary material
Source: ML conference proceedings conference paper supplement (https://proceedings.neurips.cc/paper_files/paper/2021/hash/ee389847678a3a9d1ce9e4ca69200d06-Abstract.html)
Supplement: Supplementary file 1 [file ee389847678a3a9d1ce9e4ca69200d06-Supplemental.pdf]

## A Proofs of Theorems 1 and 2

We first recall the following lemma in [8], which shows a relationship between iteration points  $x_t$  and  $x_{t+1}$ .

**Lemma 3** ([8]). *Suppose that  $\mathcal{M}$  is a Hadamard manifold with the sectional curvature lower bounded by  $-\kappa$  ( $\kappa > 0$ ) and  $\mathcal{K} \subset \mathcal{M}$  is a  $g$ -convex set. Then, for any  $x, x_t \in \mathcal{K}$ ,  $x_{t+1} = \mathcal{P}_{\mathcal{K}}(\exp_{x_t}(-\alpha_t g_t))$  satisfies*

$$\langle -g_t, \exp_{x_t}^{-1}(x) \rangle \leq \frac{1}{2\alpha_t} (d^2(x_t, x) - d^2(x_{t+1}, x)) + \frac{1}{2} \zeta(\kappa, d(x_t, x)) \alpha_t \|g_t\|^2.$$

Then we begin our proofs of Theorems 1 and 2.

*Proof of Theorem 1.* By the  $g$ -convexity, we have

$$f_t(x_t) - f_t(x^*) \leq \langle -\nabla f_t(x_t), \exp_{x_t}^{-1}(x^*) \rangle.$$

Recalling Lemma 3 gives

$$f_t(x_t) - f_t(x^*) \leq \frac{1}{2\alpha_t} (d^2(x_t, x^*) - d^2(x_{t+1}, x^*)) + \frac{1}{2} \zeta(\kappa, d(x_t, x^*)) \alpha_t \|\nabla f_t(x_t)\|^2.$$

With the Lipschitz constant  $L$ , we have

$$f_t(x_t) - f_t(x^*) \leq \frac{1}{2\alpha_t} (d^2(x_t, x^*) - d^2(x_{t+1}, x^*)) + \frac{1}{2} \zeta(\kappa, d(x_t, x^*)) L^2 \alpha_t. \quad (5)$$

Summing (5) from 1 to  $T$ , we obtain

$$\begin{aligned} R(T) &= \sum_{t=1}^T f_t(x_t) - \sum_{t=1}^T f_t(x^*) \\ &\leq \sum_{t=1}^T \frac{1}{2\alpha_t} (d^2(x_t, x^*) - d^2(x_{t+1}, x^*)) + \sum_{t=1}^T \frac{1}{2} \zeta(\kappa, d(x_t, x^*)) L^2 \alpha_t \\ &= \sum_{t=2}^T d^2(x_t, x^*) \left( \frac{1}{2\alpha_t} - \frac{1}{2\alpha_{t-1}} \right) + \frac{1}{2} \alpha_1 d^2(x_1, x^*) + \frac{1}{2} L^2 \sum_{t=1}^T \zeta(\kappa, d(x_t, x^*)) \alpha_t. \end{aligned}$$

Since the set  $\mathcal{K}$  has diameter  $D$ ,  $d(x_t, x^*) \leq D$  and  $\zeta(\kappa, d(x_t, x^*)) \leq \zeta(\kappa, D)$  for every  $t = 1, 2, \dots, T$ , which implies

$$\begin{aligned} R(T) &\leq D^2 \sum_{t=2}^T \left( \frac{1}{2\alpha_t} - \frac{1}{2\alpha_{t-1}} \right) + D^2 \frac{1}{2} \alpha_1 + \frac{1}{2} \zeta(\kappa, D) L^2 \sum_{t=1}^T \alpha_t \\ &= D^2 \frac{1}{2\alpha_T} + \frac{1}{2} \zeta(\kappa, D) L^2 \sum_{t=1}^T \alpha_t, \end{aligned}$$

Setting  $\alpha_t = \frac{D}{L\sqrt{\zeta(\kappa, D)t}}$ , we get

$$\begin{aligned} R(T) &\leq \frac{DL\sqrt{\zeta(\kappa, D)}}{2} \sqrt{T} + \frac{1}{2} \zeta(\kappa, D) L^2 \sum_{t=1}^T \alpha_t \\ &\leq \frac{DL\sqrt{\zeta(\kappa, D)}}{2} \sqrt{T} + \frac{1}{2} \zeta(\kappa, D) L^2 \frac{2D}{L\sqrt{\zeta(\kappa, D)}} \sqrt{T} \\ &= \frac{3}{2} DL\sqrt{\zeta(\kappa, D)T}, \end{aligned}$$

The second inequality is based on the inequality  $\sum_{t=1}^T \frac{1}{\sqrt{t}} \leq 2\sqrt{T}$ , and then we complete our proof.  $\square$

*Proof of Theorem 2.* By the strong g-convexity, we have

$$f_t(x_t) - f_t(x^*) \leq \langle -\nabla f_t(x_t), \exp_{x_t}^{-1}(x^*) \rangle - \frac{\mu}{2} d^2(x_t, x^*).$$

With the help of Lemma 3 and the Lipschitz constant  $L$ , we have

$$f_t(x_t) - f_t(x^*) \leq \frac{1}{2\alpha_t} (d^2(x_t, x^*) - d^2(x_{t+1}, x^*)) + \frac{1}{2} \zeta(\kappa, d(x_t, x^*)) L^2 \alpha_t - \frac{\mu}{2} d^2(x_t, x^*). \quad (6)$$

Summing (6) from 1 to  $T$ , we obtain

$$\begin{aligned} R(T) &= \sum_{t=1}^T f_t(x_t) - \sum_{t=1}^T f_t(x^*) \\ &\leq \sum_{t=1}^T \frac{1}{2\alpha_t} (d^2(x_t, x^*) - d^2(x_{t+1}, x^*)) + \sum_{t=1}^T \frac{1}{2} \zeta(\kappa, d(x_t, x^*)) L^2 \alpha_t - \sum_{t=1}^T \frac{\mu}{2} d^2(x_t, x^*) \\ &= \sum_{t=2}^T d^2(x_t, x^*) \left( \frac{1}{2\alpha_t} - \frac{1}{2\alpha_{t-1}} - \frac{\mu}{2} \right) + d^2(x_1, x^*) \left( \frac{\alpha_1}{2} - \frac{\mu}{2} \right) + \frac{1}{2} L^2 \sum_{t=1}^T \zeta(\kappa, d(x_t, x^*)) \alpha_t. \end{aligned}$$

Substituting  $d(x_t, x^*) \leq D$  and  $\zeta(\kappa, d(x_t, x^*)) \leq \zeta(\kappa, D)$  for  $t = 1, 2, \dots, T$ , we obtain

$$\begin{aligned} R(T) &\leq \sum_{t=2}^T D^2 \left( \frac{1}{\alpha_t} - \frac{1}{2\alpha_{t-1}} - \frac{\mu}{2} \right) + D^2 \left( \frac{1}{2\alpha_1} - \frac{\mu}{2} \right) + \frac{1}{2} L^2 \sum_{t=1}^T \zeta(\kappa, d(x_t, x^*)) \alpha_t \\ &= D^2 \left( \frac{1}{2\alpha_T} - \frac{\mu T}{2} \right) + \frac{1}{2} \zeta(\kappa, D) L^2 \sum_{t=1}^T \alpha_t. \end{aligned}$$

Setting  $\alpha_t = \frac{1}{\mu t}$ , we get

$$R(T) \leq 0 + \frac{1}{2} \zeta(\kappa, D) L^2 \sum_{t=1}^T \alpha_t \leq \frac{\zeta(\kappa, D) L^2}{2\mu} (1 + \log T).$$

The second inequality follows from the inequality  $\sum_{t=1}^T \frac{1}{t} \leq 1 + \log T$ , and then we complete our proof.  $\square$

## B Proof of Theorem 3

In this appendix, we first introduce an instance of Riemannian online convex optimization called Riemannian online Busemann optimization (ROBO) and then prove Theorem 3 by analyzing the worst-case regret of the ROBO problem.

### B.1 Riemannian Online Busemann Optimization

It is shown that the Busemann function [1] is useful to study the large-scale geometry of Hadamard manifolds.

**Definition 1** ([1]). Let  $\mathcal{M}$  be a Hadamard manifold and  $\gamma : [0, \infty)$  be a geodesic ray on  $\mathcal{M}$  with  $\|\dot{\gamma}(0)\| = 1$ . Then the Busemann function with  $\gamma$  is defined as

$$f_\gamma(x) = \lim_{t \rightarrow \infty} (d(x, \gamma(t)) - t).$$

Here are some properties of the Busemann function.

**Lemma 4** ([1]). For a Busemann function  $f_\gamma$ ,

- 1)  $f_\gamma$  is g-convex;

- 2)  $\nabla f_\gamma(\gamma(t)) = \dot{\gamma}(t)$  for every  $t \in [0, \infty)$ ;
- 3)  $\|\nabla f_\gamma(x)\| \leq 1$  for every  $x \in \mathcal{M}$ .

Next, we introduce some notations. Let  $D, L > 0$  be two constants,  $\mathcal{M}$  be a Hadamard manifold,  $p \in \mathcal{M}$  and  $\gamma : \mathbb{R} \rightarrow \mathcal{M}$  be a geodesic with conditions  $\|\dot{\gamma}(0)\| = 1$  and  $\gamma(0) = p$ . Then we consider an instance of R-OCO problem termed *Riemannian online Busemann optimization* (ROBO) on  $\mathcal{M}$ , where the  $g$ -convex set  $\mathcal{K}$  is the ball centered  $p$  with radius  $D$ , i.e.,

$$\mathcal{K} = \{x \in \mathcal{M} | d(x, p) \leq D\},$$

and the loss function  $f_t$  is randomly and uniformly chosen from the set

$$\{Lf_+, Lf_-\},$$

where  $f_+$  and  $f_-$  are Busemann functions related to the geodesic rays  $\gamma_+(t) = \gamma(t)$  and  $\gamma_-(t) = \gamma(-t)$ . The regret of the ROBO problem is

$$R(T) = \sum_{t=1}^T f_t(x_t) - \min_{x \in \mathcal{K}} \sum_{t=1}^T f_t(x).$$

In the last part of the subsection, we propose a lemma about the minimum of  $\sum_{t=1}^T f_t(x)$ .

**Lemma 5.** *The minimum of  $af_+(t) + bf_-(t)$ , ( $a, b \in \mathbb{N}$ ) in  $\mathcal{K}$  is  $-|a - b|D$ .*

*Proof.* By the  $g$ -convexity of  $f_+$  and  $f_-$ , we have

$$af_+(x) + bf_-(x) \geq af_+(p) + bf_-(p) + \langle a\nabla f_+(p) + b\nabla f_-(p), \exp_p^{-1}(x) \rangle, \forall x \in \mathcal{K}.$$

Because  $\nabla f_+(p) = \dot{\gamma}(0)$ ,  $\nabla f_-(p) = -\dot{\gamma}(0)$  and  $f_\pm(p) = 0$ , we have

$$af_+(x) + bf_-(x) \geq \langle (a - b)\dot{\gamma}(0), \exp_p^{-1}(x) \rangle, \forall x \in \mathcal{K}.$$

Moreover, since  $\|\dot{\gamma}(0)\| = 1$  and  $\|\exp_p^{-1}(x)\| = d(x, p) \leq D$ , we have

$$\min_{x \in \mathcal{K}} af_+(x) + bf_-(x) \geq \min_{x \in \mathcal{K}} \langle (a - b)\dot{\gamma}(0), \exp_p^{-1}(x) \rangle \geq -|a - b|D. \quad (7)$$

However, we see that  $af_+(\gamma(D)) + bf_-(\gamma(D)) = (b - a)D$  and  $af_+(\gamma(-D)) + bf_-(\gamma(-D)) = (a - b)D$ , which imply

$$\min_{x \in \mathcal{K}} af_+(x) + bf_-(x) \leq \min\{(b - a)D, (a - b)D\} = -|a - b|D. \quad (8)$$

Following from (7) and (8), we complete our proof.  $\square$

## B.2 Proof of Theorem 3

We begin our proof with an analysis of the worst-case regret of the ROBO problem. In the ROBO, the expectation of the regret on loss functions  $\{f_1, f_2, \dots, f_T\}$  is

$$\begin{aligned} \mathbb{E}_{f_1, \dots, f_T} [R(T)] &= \mathbb{E}_{f_1, \dots, f_T} \left[ \sum_{t=1}^T f_t(x_t) - \min_{x \in \mathcal{K}} \sum_{t=1}^T f_t(x) \right] \\ &= \mathbb{E}_{f_1, \dots, f_T} \left[ \sum_{t=1}^T f_t(x_t) \right] - \mathbb{E}_{f_1, \dots, f_T} \left[ \min_{x \in \mathcal{K}} \sum_{t=1}^T f_t(x) \right]. \end{aligned} \quad (9)$$

Since  $f_t$  is uniformly and independently chosen in  $\{f_+, f_-\}$ , we get

$$\begin{aligned} \mathbb{E}_{f_1, \dots, f_T} \left[ \sum_{t=1}^T f_t(x_t) \right] &= \sum_{t=1}^T \mathbb{E}_{f_t} [f_t(x_t)] \\ &= \sum_{t=1}^T \frac{1}{2} (Lf_+(x_t) + Lf_-(x_t)) \\ &\geq \frac{LT}{2} \min_{x \in \mathcal{K}} (f_+(x) + f_-(x)). \end{aligned}$$

From Lemma 5,

$$\mathbb{E}_{f_1, \dots, f_T} \left[ \sum_{t=1}^T f_t(x_t) \right] \geq 0. \quad (10)$$

Putting (10) into (9), we obtain

$$\mathbb{E}_{f_1, \dots, f_T} [R(T)] \geq -\mathbb{E}_{f_1, \dots, f_T} \left[ \min_{x \in \mathcal{K}} \sum_{t=1}^T f_t(x) \right].$$

By Lemma 5,

$$\begin{aligned} \mathbb{E}_{f_1, \dots, f_T} [R(T)] &\geq -\mathbb{E}_{f_1, \dots, f_T} \left[ \min_{x \in \mathcal{K}} \sum_{t=1}^T f_t(x) \right] \\ &= -\mathbb{E}_{f_1, \dots, f_T} \left[ -DL \left| \sum_{f_t=Lf_+} 1 - \sum_{f_t=Lf_-} 1 \right| \right] \\ &= \mathbb{E}_{\epsilon_1, \dots, \epsilon_T} \left[ DL \left| \sum_{\epsilon_t=1} 1 + \sum_{\epsilon_t=-1} -1 \right| \right] \\ &= \mathbb{E}_{\epsilon_1, \dots, \epsilon_T} \left[ DL \left| \sum_{t=1}^T \epsilon_t \right| \right], \end{aligned}$$

where  $\epsilon_t$  are i.i.d Rademacher variables  $\epsilon_t = \pm 1$  with probability 1/2. From the Khinchine's inequality [4], we finally get

$$\mathbb{E}_{f_1, \dots, f_T} [R(T)] \geq \frac{DL}{\sqrt{2}} \mathbb{E}_{\epsilon_1, \dots, \epsilon_T} \left[ \sum_{t=1}^T \epsilon_t^2 \right]^{\frac{1}{2}} = \frac{DL}{\sqrt{2}} \sqrt{T}, \quad (11)$$

which indicates that no matter how we choose strategies in the ROBO, there are a sequence of functions  $\{f_1, \dots, f_T\} \in \{Lf_+, Lf_-\}^T$  to make the regret no less than  $\frac{DL}{\sqrt{2}} \sqrt{T}$ . Considering that the diameter of the set  $\mathcal{K}$  is  $2D$  and the Lipschitz constant of  $\{Lf_+, Lf_-\}$  is  $L$ , we complete our proof.

## C Proofs of Lemmas 1 and 2

In this appendix, we first introduce some fundamental definitions and technical lemmas, and then we prove Lemmas 1 and 2 in Subsections C.2 and C.3, respectively.

### C.1 Basic Definitions and Technical Lemmas

We discuss two special kinds of vector fields, namely, the *Killing field* and the *Jacobi field*.

**Definition 2** (Killing field). A vector field  $\eta$  is a Killing field if it satisfies

$$\langle \nabla_X \eta, Y \rangle + \langle \nabla_Y \eta, X \rangle = 0, \forall X, Y \in \mathfrak{X}(M),$$

**Definition 3** (Jacobi field). A vector field  $\eta$  along a geodesic  $\gamma$  is a Jacobi field if it satisfies the Jacobi equation

$$\nabla_{\dot{\gamma}} \nabla_{\dot{\gamma}} \eta + R(\dot{\gamma}, \eta) \dot{\gamma} = 0,$$

where  $R$  is the curvature tensor of  $\mathcal{M}$  (see [5, Chapter 4.2]).

For vector fields, we mainly consider about their *flows* and *divergence*.

**Definition 4** (Flow). Suppose that  $\mathcal{M}$  is a smooth manifold,  $X \in \mathfrak{X}(\mathcal{M})$  and there is a smooth map  $\phi : \mathbb{R} \times \mathcal{M} \rightarrow \mathcal{M}$ ,

$$\phi_t(p) = \phi(t, p), (t, p) \in \mathbb{R} \times \mathcal{M},$$

satisfying the following conditions:

- 1)  $\phi_0(p) = p$ ;
- 2)  $\phi_s \circ \phi_t = \phi_{s+t}$  for any real numbers  $s, t$ ;
- 3)  $X(p) = \left. \frac{\partial \phi_t(p)}{\partial t} \right|_{t=0}$ .

Then we call  $\phi_t$  the flow (or the one-parameter group of diffeomorphism) of  $X$ , and call  $X$  the infinitesimal transformation of  $\phi_t$ .

**Definition 5** (Divergence). For a vector field  $X$ , the divergence  $Div(X)$  is the trace of the operator  $\nabla X$ . More precisely, if  $\{e_1, \dots, e_n\}$  is a normal orthogonal basis at tangent space  $T_x \mathcal{M}$ , the divergence of  $X$  at  $x$  can be expressed as

$$Div(X)(x) = \sum_{i=1}^n \langle \nabla_{e_i} X(x), e_i \rangle.$$

Then we present some lemmas that are needed in the following proofs.

**Lemma 6** ([2]). *If  $\eta \in \mathfrak{X}(M)$  is a Killing vector field, then*

- 1) *For every vector field  $X$ ,  $\langle \nabla_X \eta, X \rangle = 0$ . As a corollary, the divergence  $Div(\eta) \equiv 0$ .*
- 2) *For every geodesic  $\gamma$ ,  $\eta|_\gamma$  is a Jacobi field.*

**Lemma 7** ([3]). *If  $\eta$  is a Jacobi vector field along a geodesic  $\gamma : [0, 1] \rightarrow \mathbb{R}$ . Denote  $\eta(t) = \eta(\gamma(t))$ . Then*

$$\langle \eta(t), \dot{\gamma}(t) \rangle = \langle \eta(0), \dot{\gamma}(t) \rangle + t \langle \nabla_{\dot{\gamma}} \eta(0), \dot{\gamma}(t) \rangle$$

for all  $t \in [0, 1]$ .

**Lemma 8** ([7]). *Let  $\mathcal{M}$  be a simply connected complete Riemannian homogeneous manifold. Then for every  $x \in M$  and every  $X \in T_x \mathcal{M}$ , there exists a Killing vector field  $\eta$  such that  $\eta(x) = X$ . The flow of  $\eta$  exists and consists of a one-parameter group of isometries.*

**Lemma 9** (Divergence theorem,[6]). *Let  $\mathcal{M}$  be a Riemannian manifold  $\mathcal{M}$  with the volume form  $\omega$ ,  $\mathcal{K} \subset \mathcal{M}$  with the boundary  $\partial \mathcal{K}$ , and  $\vec{n}$  be the (outer) unit normal vector field of  $\partial \mathcal{K}$ . Then, for any vector field  $X$  and any differentiable function  $f$ ,*

$$\int_{\mathcal{K}} X(f)(u) \omega = \int_{\partial \mathcal{K}} f(u) \langle X, \vec{n} \rangle \omega_{\partial \mathcal{K}} - \int_{\mathcal{K}} Div(X) f(u) \omega,$$

where  $\omega_{\partial \mathcal{K}}$  is the volume form of  $\partial \mathcal{K}$  induced by  $\omega$ .

**Lemma 10** (Bishop-Gromov volume comparison theorem, [6]). *Let  $\mathcal{M}$  be an  $n$ -dimensional Riemannian manifold with sectional curvature lower bounded by  $-\kappa$  ( $\kappa \geq 0$ ). Given  $p \in \mathcal{M}$ , denote  $V_r$  as the volume of the ball of radius  $\delta$  about  $p$  and  $V_{r,\kappa}$  as the volume of a ball of radius  $r$  on the  $n$ -dimensional hyperbolic space with constant curvature  $-\kappa$ . Then the function*

$$g(r) = \frac{V_r}{V_{r,\kappa}}$$

is non-increasing.

## C.2 Proof of Lemma 1

We start with the first part of the lemma.

Take a vector  $X \in M_x$  arbitrarily. From Lemma 8, we can find a Killing vector field  $\eta$  on  $\mathcal{M}$  such that  $\eta(x) = X$ . The flow of  $\eta$  consists of a one-parameter group of isometries  $\{\phi_t\}_{t \in \mathbb{R}}$ . Then the directional derivative of  $\hat{f}$  along  $X$  can be written as

$$X(\hat{f}(x)) = \lim_{t \rightarrow 0} \frac{\hat{f}(\phi_t(x)) - \hat{f}(x)}{t} = \frac{1}{V_\delta} \lim_{t \rightarrow 0} \frac{1}{t} \left( \int_{B_\delta(\phi_t(x))} f(u) \omega - \int_{B_\delta(x)} f(u) \omega \right). \quad (12)$$

Since  $\phi_t$  is an isometry that preserves the distance,  $\phi_t(B_\delta(x)) = B_\delta(\phi_t(x))$ . By the substitution rule of integration ([5, Chapter 3.3]), we have

$$\int_{B_\delta(\phi_t(x))} f(u) \omega = \int_{B_\delta(x)} f(\phi_t(u)) \phi_t^*(\omega). \quad (13)$$

Because  $\phi_t$  preserves the metric  $g$ , it preserves the volume form, i.e.,  $\phi_t^*(\omega) = \omega$ , which gives

$$\int_{B_\delta(\phi_t(x))} f(u)\omega = \int_{B_\delta(x)} f(\phi_t(u))\omega. \quad (14)$$

Combining equations (12) and (14) together, we have

$$\begin{aligned} X(\hat{f}(x)) &= \frac{1}{V_\delta} \int_{B_\delta(x)} \lim_{t \rightarrow 0} \frac{f(\phi_t(u)) - f(u)}{t} \omega \\ &= \frac{1}{V_\delta} \int_{B_\delta(x)} \left( \frac{\partial \phi_t(p)}{\partial t} \Big|_{t=0} \right) f \omega. \end{aligned} \quad (15)$$

By Definition 4,  $\frac{\partial \phi_t(u)}{\partial t} \Big|_{t=0} = \eta(u)$ . Hence, we rewrite (15) as

$$X(\hat{f}(x)) = \frac{1}{V_\delta} \int_{B_\delta(x)} \eta(f)\omega.$$

According to Lemma 9,

$$\begin{aligned} X(\hat{f}(x)) &= \frac{1}{V_\delta} \int_{S_\delta(x)} f(u) \langle \eta(u), \vec{n}(u) \rangle \omega_{S_\delta(x)} - \frac{1}{V_\delta} \int_{B_\delta(x)} \text{Div}(\eta)(u) f(u) \omega \\ &= \frac{1}{V_\delta} \int_{S_\delta(x)} f(u) \langle \eta(u), \vec{n}(u) \rangle \omega_{S_\delta(x)}, \end{aligned} \quad (16)$$

where  $\omega_{S_\delta(x)}$  is the volume form of  $S_\delta(x)$  induced by  $\omega$  and  $\vec{n}$  is the (outer) unit normal vector field of  $S_\delta(x)$ . The last equation is because  $\text{Div}(\eta) \equiv 0$ , as stated in Lemma 6.

Then we compute  $\langle \eta, \vec{n} \rangle$  for each point  $u \in S_\delta(x)$ . Since geodesics start at the center  $x$  are normal to the sphere  $S_\delta(x)$ , the outer normal vector  $\vec{n}(u)$  can be written as  $\frac{\dot{\gamma}_u(1)}{\|\dot{\gamma}_u(1)\|}$  for the geodesic  $\gamma_u$  such that  $\gamma_u(0) = x$  and  $\gamma_u(1) = u$ . Therefore,

$$\langle \eta(u), \vec{n}(u) \rangle = \frac{1}{\|\dot{\gamma}_u(1)\|} \langle \eta(\gamma_u(1)), \dot{\gamma}_u(1) \rangle.$$

Since  $\eta$  is Killing, by Lemma 6,  $\eta(\gamma_u(t))$  is Jacobi. By Lemma 7,

$$\begin{aligned} \langle \eta(u), \vec{n}(u) \rangle &= \frac{1}{\|\dot{\gamma}_u(1)\|} \langle \eta(\gamma_u(1)), \dot{\gamma}_u(1) \rangle \\ &= \frac{1}{\|\dot{\gamma}_u(1)\|} \langle \eta(\gamma_u(0)), \dot{\gamma}_u(0) \rangle + 1 \langle \nabla_{\dot{\gamma}_u} \eta(\gamma_u(0)), \dot{\gamma}_u(0) \rangle \\ &= \frac{1}{\|\dot{\gamma}_u(0)\|} \langle \eta(\gamma_u(0)), \dot{\gamma}_u(0) \rangle + 0. \end{aligned} \quad (17)$$

Applying  $\eta(\gamma_u(0)) = \eta(x) = X$  and  $\dot{\gamma}_u(0) = \exp_x^{-1}(u)$  to (17) yields

$$\langle \eta(u), \vec{n}(u) \rangle = \frac{\langle X, \exp_x^{-1}(u) \rangle}{\|\exp_x^{-1}(u)\|}. \quad (18)$$

Substituting (18) to (16), we have

$$X(\hat{f}(x)) = \frac{1}{V_\delta} \int_{S_\delta(x)} f(u) \frac{\langle X, \exp_x^{-1}(u) \rangle}{\|\exp_x^{-1}(u)\|} \omega_{S_\delta(x)} = \left\langle \frac{1}{V_\delta} \int_{S_\delta(x)} f(u) \frac{\exp_x^{-1}(u)}{\|\exp_x^{-1}(u)\|} \omega_{S_\delta(x)}, X \right\rangle.$$

Because the directional derivative  $X(\hat{f}(x))$  coincides with the term  $\langle \nabla \hat{f}(x), X \rangle$ , we obtain

$$\langle \nabla \hat{f}(x), X \rangle = \left\langle \frac{1}{V_\delta} \int_{S_\delta(x)} f(u) \frac{\exp_x^{-1}(u)}{\|\exp_x^{-1}(u)\|} \omega_{S_\delta(x)}, X \right\rangle.$$

Since  $X$  is arbitrary,

$$\nabla \hat{f}(x) = \frac{1}{V_\delta} \int_{S_\delta(x)} f(u) \frac{\exp_x^{-1}(u)}{\|\exp_x^{-1}(u)\|} \omega_{S_\delta(x)} = \frac{S_\delta}{V_\delta} E_{u \in S_\delta(x)} \left[ f(u) \frac{\exp_x^{-1}(u)}{\|\exp_x^{-1}(u)\|} \right],$$

which completes the proof of the first part.

Then we examine the second part of the lemma.

From the first part, it is clearly to see  $\|\nabla \hat{f}(x)\| \leq \frac{S_\delta}{V_\delta} C$ . Since the sectional curvature of  $\mathcal{M}$  is lower bounded by  $-\kappa$ , the function  $g(r) = \frac{V_r}{V_{r,\kappa}}$  is non-increasing from Lemma 10 and so does  $\log g(r)$ . Therefore,

$$\frac{d}{dr} \log(g(r)) = \frac{d}{dr} \log V_r - \frac{d}{dr} \log V_{r,\kappa} \leq 0.$$

Since deriving the volume of a ball along the radius gives the surface area of its sphere, we write

$$\frac{d}{dr} \log(g(r)) = \frac{S_r}{V_r} - \frac{S_{r,\kappa}}{V_{r,\kappa}} \leq 0, \quad (19)$$

where  $S_r$  and  $S_{r,\kappa}$  are the surface area of the balls in  $\mathcal{M}$  and the hyperbolic space, respectively.

Setting  $r = \delta$  in (19), we get  $\frac{S_\delta}{V_\delta} \leq \frac{S_{\delta,\kappa}}{V_{\delta,\kappa}}$ . From calculation, it shows that

$$\frac{S_{\delta,\kappa}}{V_{\delta,\kappa}} = \frac{\sinh^{n-1}(\sqrt{\kappa}\delta)}{\int_0^\delta \sinh^{n-1}(\sqrt{\kappa}t) dt}.$$

Consequently,

$$\|\nabla \hat{f}(x)\| \leq C \frac{\sinh^{n-1}(\sqrt{\kappa}\delta)}{\int_0^\delta \sinh^{n-1}(\sqrt{\kappa}t) dt}.$$

By a change of variable  $u = \sinh t$ ,

$$\int_0^\delta \sinh^{n-1}(\sqrt{\kappa}t) dt = \kappa^{-1/2} \int_0^{\sinh(\sqrt{\kappa}\delta)} u^{n-1} (1+u)^{-1/2} du.$$

Integration by parts gives

$$\begin{aligned} \int_0^\delta \sinh^{n-1}(\sqrt{\kappa}t) dt &= \frac{\sinh^n(\sqrt{\kappa}\delta)}{n\sqrt{\kappa} \cosh(\sqrt{\kappa}\delta)} + \kappa^{-1/2} \int_0^{\sinh(\sqrt{\kappa}\delta)} u^{n-1} (1+u)^{-1/2} du \\ &\geq \frac{\sinh^n(\sqrt{\kappa}\delta)}{n\sqrt{\kappa} \cosh(\sqrt{\kappa}\delta)}. \end{aligned}$$

Putting it into the expression of  $\frac{S_\delta}{V_\delta}$ , we get

$$\frac{S_\delta}{V_\delta} \leq n\sqrt{\kappa} \coth(\sqrt{\kappa}\delta).$$

Applying the inequality  $\coth(x) < x + 1/x$ , we have

$$\frac{S_\delta}{V_\delta} \leq \frac{n}{\delta} + n\kappa\delta, \quad \forall \delta > 0.$$

Hence, for every  $\delta > 0$ ,

$$\|\nabla \hat{f}(x)\| \leq \frac{S_\delta}{V_\delta} C \leq C \left( \frac{n}{\delta} + n\kappa\delta \right),$$

which completes our proof.

### C.3 Proof of Lemma 2

Without loss of generality, we assume  $f(x) = 0$ . By the homogeneity of the manifold  $\mathcal{M}$ , we find an isometry  $\phi$  such that  $\phi(x) = y$ . Denote  $V(u)$  as the vector field  $V(u) = \exp_u^{-1}(\phi(u))$ . Clearly,

$$\begin{aligned} \hat{f}(y) - \hat{f}(x) &= \frac{1}{V_\delta} \left( \int_{B_\delta(y)} f(u) \omega - \int_{B_\delta(x)} f(u) \omega \right) \\ &= \frac{1}{V_\delta} \left( \int_{B_\delta(\phi(x))} f(u) \omega - \int_{B_\delta(x)} f(u) \omega \right). \end{aligned}$$

With the method shown in (13) and (14),

$$\hat{f}(y) - \hat{f}(x) = \frac{1}{V_\delta} \int_{B_\delta(x)} f(\phi(u)) - f(u) \omega.$$

By the g-convexity of  $f$ ,

$$\begin{aligned} \hat{f}(y) - \hat{f}(x) &= \frac{1}{V_\delta} \int_{B_\delta(x)} f(\phi(u)) - f(u) \omega \\ &\geq \frac{1}{V_\delta} \int_{B_\delta(x)} \langle \nabla f(u), \exp_u^{-1}(\phi(u)) \rangle \omega \\ &= \frac{1}{V_\delta} \int_{B_\delta(x)} \langle \nabla f(u), V(u) \rangle \omega \\ &= \frac{1}{V_\delta} \int_{B_\delta(x)} V(f(u)) \omega. \end{aligned} \quad (20)$$

By Lemma 9,

$$\int_{B_\delta(x)} V(f(u)) \omega = \int_{S_\delta(x)} f(u) \langle V(u), \vec{n}(u) \rangle \omega_{S_\delta(x)} - \int_{B_\delta(x)} \text{Div}(V) f(u) \omega. \quad (21)$$

Hence, we rewrite (20) as

$$\hat{f}(y) - \hat{f}(x) \geq \frac{1}{V_\delta} \left( \int_{S_\delta(x)} f(u) \langle V(u), \vec{n}(u) \rangle \omega_{S_\delta(x)} - \int_{B_\delta(x)} \text{Div}(V) f(u) \omega \right). \quad (22)$$

In Lemma 1, we have already shown that

$$\begin{aligned} \langle \nabla \hat{f}(x), \exp_x^{-1}(y) \rangle &= \left\langle \frac{1}{V_\delta} \int_{S_\delta(x)} f(u) \frac{\exp_x^{-1}(u)}{\|\exp_x^{-1}(u)\|} \omega_{S_\delta(x)}, \exp_x^{-1}(y) \right\rangle \\ &= \left\langle \frac{1}{V_\delta} \int_{S_\delta(x)} f(u) \frac{\exp_x^{-1}(u)}{\|\exp_x^{-1}(u)\|} \omega_{S_\delta(x)}, V(x) \right\rangle \end{aligned} \quad (23)$$

Denote  $\vec{m}(u)$  as the vector  $\frac{\exp_x^{-1}(u)}{\|\exp_x^{-1}(u)\|}$ . Combining (21) and (23) gives

$$\begin{aligned} \hat{f}(y) - \hat{f}(x) - \langle \nabla \hat{f}(x), \exp_x^{-1}(y) \rangle &\geq \frac{1}{V_\delta} \left( \int_{S_\delta(x)} f(u) \left( \langle V(u), \vec{n}(u) \rangle - \langle V(x), \vec{m}(u) \rangle \right) \omega_{S_\delta(x)} \right) \\ &\quad - \frac{1}{V_\delta} \left( \int_{B_\delta(x)} \text{Div}(V) f(u) \omega \right). \end{aligned} \quad (24)$$

Here we claim

$$\langle V(u), \vec{n}(u) \rangle - \langle V(x), \vec{m}(u) \rangle \leq 0, \quad \forall u \in S_\delta(x). \quad (*)$$

If the claim (\*) holds (whose proof will be presented in C.4), then, with the g-L-Lipschitz of  $f$  and the condition  $f(x) = 0$ , we have

$$\begin{aligned} &\int_{S_\delta(x)} f(u) \left( \langle V(u), \vec{n}(u) \rangle - \langle V(x), \vec{m}(u) \rangle \right) \omega_{S_\delta(x)} \\ &\geq \int_{S_\delta(x)} \delta L \left( \langle V(u), \vec{n}(u) \rangle - \langle V(x), \vec{m}(u) \rangle \right) \omega_{S_\delta(x)} \\ &= \left( \int_{S_\delta(x)} \delta L \langle V(u), \vec{n}(u) \rangle \omega_{S_\delta(x)} \right) - \left( \int_{S_\delta(x)} \delta L \langle V(x), \vec{m}(u) \rangle \omega_{S_\delta(x)} \right). \end{aligned} \quad (25)$$

By Lemma 1,  $\frac{1}{V_\delta} \int_{S_\delta(x)} \delta L \langle V(x), \vec{m}(u) \rangle \omega_{S_\delta(x)}$  in (25) is the gradient of the function

$$\hat{g}(x) = \frac{1}{V_\delta} \left( \int_{B_\delta(x)} \delta L \cdot \omega \right) \equiv \delta L,$$

and then

$$\frac{1}{V_\delta} \int_{S_\delta(x)} \delta L \langle V(x), \vec{m}(u) \rangle \omega_{S_\delta(x)} = 0. \quad (26)$$

Combining (24)-(26), we have

$$\begin{aligned} \hat{f}(y) - \hat{f}(x) - \langle \nabla \hat{f}(x), \exp_x^{-1}(y) \rangle &\geq \frac{1}{V_\delta} \left( \int_{S_\delta(x)} \delta L \langle V(u), \vec{n}(u) \rangle \omega_{S_\delta(x)} \right) \\ &\quad - \frac{1}{V_\delta} \left( \int_{B_\delta(x)} \text{Div}(V) f(u) \omega \right). \end{aligned}$$

Applying Lemma 9 again, we obtain

$$\begin{aligned} \frac{1}{V_\delta} \int_{S_\delta(x)} \delta L \langle V(u), \vec{n}(u) \rangle \omega_{S_\delta(x)} &= \frac{1}{V_\delta} \int_{B_\delta(x)} V(\delta L) \omega - \frac{1}{V_\delta} \left( \int_{B_\delta(x)} \text{Div}(V) \delta L \omega \right) \\ &= -\frac{1}{V_\delta} \left( \int_{B_\delta(x)} \text{Div}(V) \delta L \omega \right). \end{aligned}$$

Therefore,

$$\begin{aligned} \hat{f}(y) - \hat{f}(x) - \langle \nabla \hat{f}(x), \exp_x^{-1}(y) \rangle &\geq -\frac{1}{V_\delta} \left( \int_{B_\delta(x)} \text{Div}(V)(f(x) + \delta L) \omega \right) \\ &\geq -2\delta L \sup_{u \in B_\delta(x)} |\text{Div}(V(u))|. \end{aligned} \quad (27)$$

Note that  $V(u) = \exp_u^{-1}(\phi(u))$  is continuous on  $p$  and  $\phi$ , and  $\phi$  is continuous on  $x$  and  $y$ . Thus,  $|\text{Div}(V(u))|$  is a continuous function of  $(x, y, u) \in \bar{\mathcal{K}} \times \bar{\mathcal{K}} \times \bar{\mathcal{K}}$ . Denote

$$\rho = \sup_{(x, y, u) \in \bar{\mathcal{K}} \times \bar{\mathcal{K}} \times \bar{\mathcal{K}}} |\text{Div}(V(u))|.$$

Since the boundedness of  $\mathcal{K}$  set yields the compactness of  $\bar{\mathcal{K}} \times \bar{\mathcal{K}} \times \bar{\mathcal{K}}$ , we have  $\rho < \infty$ . Putting  $\rho$  into (27) establishes the formula in Lemma 7.

#### C.4 Proof of the Claim (\*)

Fix  $u \in S_\delta(x)$  and denote  $\xi_u(s) = \exp_x(s\vec{m}(u))$  as the geodesic with the initial tangent vector  $\vec{m}(u)$ . Consider the following rectangle map

$$\begin{aligned} \Gamma_u : [0, 1] \times [0, \delta] &\rightarrow \mathcal{M} \\ (t, s) &\rightarrow \exp_{\xi_u(s)}(tV(\xi_u(s))). \end{aligned}$$

Set  $T(t, s) = \frac{\partial \Gamma_u}{\partial t}(t, s)$  and  $S(t, s) = \frac{\partial \Gamma_u}{\partial s}(t, s)$ . For a fixed  $t$ , the length of the curve  $\gamma_t(s) = \Gamma_u(t, s)$ ,  $(0 \leq s \leq \delta)$  is defined as

$$l_u(t) = \int_0^\delta \sqrt{\langle S(t, s), S(t, s) \rangle} ds.$$

The first variation formula (see [6, Theorem 6.3]) gives,

$$l'_u(0) = \langle T(0, \delta), S(0, \delta) \rangle - \langle T(0, 0), S(0, 0) \rangle.$$

Because

$$T(0, s) = V(\xi_u(s)), \forall s \in [0, \delta]$$

and

$$S(0, 0) = \vec{m}(u), S(0, \delta) = \vec{n}(u),$$

we have

$$l'_u(0) = \langle V(u), \vec{n}(u) \rangle - \langle V(x), \vec{m}(u) \rangle.$$

To prove (\*), it is sufficient to show that  $l'_u(0) \leq 0$ . Let us focus on the second derivative of the function  $l_u(t)$ , that is,

$$\begin{aligned}
l''_u(t) &= \frac{d^2}{dt^2} \int_0^\delta \sqrt{\langle S(t, s), S(t, s) \rangle} ds \\
&= \int_0^\delta \frac{d^2}{dt^2} \sqrt{\langle S(t, s), S(t, s) \rangle} ds \\
&= \int_0^\delta \frac{d}{dt} \left( \frac{1}{\|S\|} \langle \nabla_T S, S \rangle \right) ds \\
&= \int_0^\delta -\frac{1}{\|S\|^3} \langle \nabla_T S, S \rangle^2 + \frac{1}{\|S\|} \langle \nabla_T S, \nabla_T S \rangle + \frac{1}{\|S\|} \langle \nabla_T \nabla_T S, S \rangle ds. \tag{28}
\end{aligned}$$

For every fixed  $s$ , the curve  $\gamma_s(t) = \Gamma_u(t, s)$  is a geodesic, hence,  $S$  is the variation field of the geodesic  $\gamma_s(t)$  and becomes a Jacobi field. Putting the Jacobi equation (Definition 4) into (28), we have

$$l''_u(t) = \int_0^\delta -\frac{1}{\|S\|^3} \langle \nabla_T S, S \rangle^2 + \frac{1}{\|S\|} \langle \nabla_T S, \nabla_T S \rangle + \frac{1}{\|S\|} - R(T, S, S, T) ds.$$

By the Cauchy–Schwarz inequality,  $-\langle \nabla_T S, S \rangle^2 \geq -\|S\|^2 \|\nabla_T S\|^2$ , which yields

$$\begin{aligned}
l''_u(t) &\geq \int_0^\delta -\frac{1}{\|S\|^3} - \|S\|^2 \|\nabla_T S\|^2 + \frac{1}{\|S\|} \langle \nabla_T S, \nabla_T S \rangle + \frac{1}{\|S\|} - R(T, S, S, T) ds \\
&\geq \int_0^\delta \frac{1}{\|S\|} - R(T, S, S, T) ds
\end{aligned}$$

From the definition of the sectional curvature,  $R(T, S, S, T) = K(\Pi)|T \wedge S|^2$ , where  $K(\Pi)$  is the sectional curvature of the two-dimensional submanifold spanned by  $T$  and  $S$ . Since  $\mathcal{M}$  has nonpositive sectional curvature, we get

$$l''_u(t) \geq \int_0^\delta \frac{1}{\|S\|} - R(T, S, S, T) ds \geq 0,$$

which means that  $l_u(t)$  is convex in  $[0, 1]$ .

Let us look back on the function  $l_u(t)$ . Note that the 0-curve is

$$\gamma_s(0) = \xi(s),$$

and the 1-curve is

$$\gamma_s(1) = \exp_{\xi(s)}(V(\xi(s))) = \exp_{\xi(s)}(\exp_{\xi(s)}^{-1}(\phi(\xi(s)))) = \phi(\xi(s)).$$

Since the mapping  $\phi$  is an isometry, the length of  $\xi(s)$  is equal to the length of  $\phi(\xi(s))$ . As a result,

$$l_u(0) = l_u(1).$$

The convexity of  $l_u$  immediately leads to

$$l'_u(0) \leq 0,$$

which proves the claim (\*).

## D Proof of Theorem 4

Before the proof, we propose two lemmas. Lemma 11 is about the expected online gradient descent on Riemannian manifolds.

**Lemma 11.** *Suppose that  $S$  is a  $g$ -convex set of  $\mathcal{M}$  with diameter  $D$  and  $\{f_t\}_{t=1,2,\dots,T}$  is a series of smooth functions and there exists a constant  $\lambda \geq 0$  such that*

$$f_t(x) - f_t(y) - \langle \nabla f_t(x), \exp_x^{-1}(y) \rangle \geq -\lambda, \tag{29}$$

for any  $x, y \in S$  and  $t = 1, 2, \dots, T$ . If the sequence  $\{x_t\}_{t=1,2,\dots,T}$  is generated by

$$x_{t+1} = P_S(\exp_{x_t}(-\alpha g_t)),$$

where  $\alpha > 0$  and  $g_t$  is a random vector bounded by  $G$  such that  $\mathbb{E}[g_t|x_t] = \nabla f_t(x_t)$  for every  $t = 1, 2, \dots, T$ , then, with taking  $\alpha = \frac{D}{G\sqrt{\zeta(\kappa, D)T}}$ , we have

$$\mathbb{E}\left[\sum_{t=1}^T f_t(x_t)\right] - \min_{x \in \mathcal{K}} \sum_{t=1}^T f_t(x) \leq DG\sqrt{\zeta(\kappa, D)T} + \lambda T.$$

*Proof.* Let  $x^* = \arg \min_{x \in \mathcal{K}} \sum_{t=1}^T f_t(x)$ . From (29), the difference between  $f_t(x_t)$  and  $f_t(x^*)$  is bounded by

$$\begin{aligned} f_t(x_t) - f_t(x^*) &\leq \langle \nabla f_t(x_t), \exp_{x_t}^{-1}(x^*) \rangle + \lambda \\ &= \langle \mathbb{E}[g_t|x_t], \exp_{x_t}^{-1}(x^*) \rangle + \lambda \\ &= \mathbb{E}\left[\langle g_t, \exp_{x_t}^{-1}(x^*) \rangle | x_t\right] + \lambda. \end{aligned}$$

Taking the expectation on both sides yields

$$\mathbb{E}[f_t(x_t) - f_t(x^*)] \leq \mathbb{E}\left[\langle g_t, \exp_{x_t}^{-1}(x^*) \rangle\right] + \lambda.$$

From Lemma 3,

$$\mathbb{E}[f_t(x_t) - f_t(x^*)] \leq \mathbb{E}\left[\frac{1}{2\alpha}(d^2(x_t, x^*) - d^2(x_{t+1}, x^*)) + \frac{1}{2}\zeta(\kappa, d(x_t, x^*))\alpha\|g_t\|^2\right] + \lambda. \quad (30)$$

Summing (30) from 1 to  $T$ , we have

$$\begin{aligned} \sum_{t=1}^T \mathbb{E}[f_t(x_t) - f_t(x^*)] &\leq \sum_{t=1}^T \mathbb{E}\left[\frac{1}{2\alpha}(d^2(x_t, x^*) - d^2(x_{t+1}, x^*)) + \frac{\alpha}{2}\zeta(\kappa, d(x_t, x^*))\|g_t\|^2\right] + \lambda T \\ &\leq \mathbb{E}\left[\frac{1}{2\alpha}d^2(x_1, x^*)\right] + \sum_{t=1}^T \mathbb{E}\left[\frac{\alpha}{2}\zeta(\kappa, d^2(x_t, x^*))G^2\right] + \lambda T \\ &\leq \frac{D^2}{2\alpha} + \frac{\alpha}{2}\zeta(\kappa, D)G^2T + \lambda T. \end{aligned} \quad (31)$$

The last inequality is because  $S$  is of diameter  $D$ . Putting  $\alpha = \frac{D}{G\sqrt{\zeta(\kappa, D)T}}$  in (31), we complete our proof.  $\square$

Lemma 12 reveals a relationship between the offline optimum in  $(1 - \tau)\mathcal{K}$  and  $\mathcal{K}$ .

**Lemma 12.** *Suppose that Assumption 6 holds, and  $\{f_t\}_{t=1,\dots,T}$  is a sequence of  $g$ -convex function defined on  $\mathcal{K}$  bounded by  $C$ . Then*

$$\min_{x \in (1-\tau)\mathcal{K}} \sum_{t=1}^T f_t(x) \leq 2\tau CT + \min_{x \in \mathcal{K}} \sum_{t=1}^T f_t(x)$$

*Proof.* Since  $(1 - \tau)\mathcal{K} = \{\exp_p((1 - \tau)u) | u = \exp_p^{-1}(x) \in \mathcal{K}\}$ , it is easy to check

$$\min_{x \in (1-\tau)\mathcal{K}} \sum_{t=1}^T f_t(x) = \min_{x \in \mathcal{K}} \sum_{t=1}^T f_t\left(\exp_p((1 - \tau)\exp_p^{-1}(x))\right).$$

By the  $g$ -convexity of  $f_t$ , we have

$$\begin{aligned}
\min_{x \in \mathcal{K}} \sum_{t=1}^T f_t \left( \exp_p \left( (1-\tau) \exp_p^{-1}(x) \right) \right) &\leq \min_{x \in \mathcal{K}} \sum_{t=1}^T \tau f_t(p) + (1-\tau) f_t(x) \\
&\leq \min_{x \in \mathcal{K}} \sum_{t=1}^T \tau (f_t(p) - f_t(x)) + f_t(x) \\
&\leq \min_{x \in \mathcal{K}} \sum_{t=1}^T \tau 2C + f_t(x) \\
&\leq 2\tau CT + \min_{x \in \mathcal{K}} \sum_{t=1}^T f_t(x),
\end{aligned}$$

which completes our proof.  $\square$

Now it is time to prove Theorem 4.

*Proof of Theorem 4.* Denote  $x_\tau^*$  as the minimizer of the problem  $\min_{x \in (1-\tau)\mathcal{K}} \sum_{t=1}^T f_t(x)$ , and then the expectation can be reformulated as

$$\begin{aligned}
\mathbb{E}[R(T)] &= \sum_{t=1}^T \mathbb{E} \left[ f_t(x_t) - f_t(x^*) \right] \\
&= \mathbb{E} \left[ \sum_{t=1}^T (f_t(x_t) - f_t(y_t)) \right] + \mathbb{E} \left[ \sum_{t=1}^T (f_t(y_t) - \hat{f}_t(y_t)) \right] + \mathbb{E} \left[ \sum_{t=1}^T (\hat{f}_t(y_t) - \hat{f}_t(x_\tau^*)) \right] \\
&\quad + \mathbb{E} \left[ \sum_{t=1}^T (\hat{f}_t(x_\tau^*) - f_t(x_\tau^*)) \right] + \mathbb{E} \left[ \sum_{t=1}^T (f_t(x_\tau^*) - f_t(x^*)) \right].
\end{aligned}$$

The Lipschitz condition leads to  $|f_t(x_t) - f_t(y_t)| \leq \delta L$  and  $|f_t(x) - \hat{f}_t(x)| < \delta L$ , and recalling Lemma 12 yields  $\sum_{t=1}^T (f_t(x_\tau^*) - f_t(x^*)) \leq 2\tau CT$ . Putting them altogether,

$$\mathbb{E}[R(T)] \leq \mathbb{E} \left[ \sum_{t=1}^T (\hat{f}_t(y_t) - \hat{f}_t(x_\tau^*)) \right] + 3\delta LT + 2\tau CT \quad (32)$$

To estimate the term  $\mathbb{E} \left[ \sum_{t=1}^T (\hat{f}_t(y_t) - \hat{f}_t(x_\tau^*)) \right]$ , we focus on the update rule of  $y_t$ , that is,

$$\begin{aligned}
y_{t+1} &= P_{(1-\tau)\mathcal{K}} \left( \exp_{y_t} \left( \alpha f_t(x_t) \frac{\exp_{y_t}^{-1}(x_t)}{\|\exp_{y_t}^{-1}(x_t)\|} \right) \right) \\
&= P_{(1-\tau)\mathcal{K}} \left( \exp_{y_t} \left( \frac{D}{C\sqrt{\zeta(\kappa, D)T}} f_t(x_t) \frac{\exp_{y_t}^{-1}(x_t)}{\|\exp_{y_t}^{-1}(x_t)\|} \right) \right) \\
&= P_{(1-\tau)\mathcal{K}} \left( \exp_{y_t} \left( \frac{D}{\frac{S_\delta}{V_\delta} C\sqrt{\zeta(\kappa, D)T}} \frac{S_\delta}{V_\delta} f_t(x_t) \frac{\exp_{y_t}^{-1}(x_t)}{\|\exp_{y_t}^{-1}(x_t)\|} \right) \right).
\end{aligned}$$

From what we have proved in Lemma 1 we obtain  $\mathbb{E} \left[ \frac{S_\delta}{V_\delta} f_t(x_t) \frac{\exp_{y_t}^{-1}(x_t)}{\|\exp_{y_t}^{-1}(x_t)\|} \middle| y_t \right] = \nabla \hat{f}(y_t)$  and  $\|\hat{f}(y_t)\| \leq \frac{S_\delta}{V_\delta} C$ . Consequently, it is clear to see that the update rule here is that of expected gradient descent in Lemma 11 with parameters  $S = (1-\tau)\mathcal{K}$ ,  $G = \frac{S_\delta}{V_\delta} C$ ,  $\lambda = 2\delta\rho L$  and the step size  $\alpha = \frac{D}{G\sqrt{\zeta(\kappa, D)T}}$ . Thus,

$$\mathbb{E} \left[ \sum_{t=1}^T f_t(x_t) \right] - \min_{x \in (1-\tau)\mathcal{K}} \sum_{t=1}^T f_t(x) \leq \frac{S_\delta}{V_\delta} DC\sqrt{\zeta(\kappa, D)T} + 2\delta\rho LT. \quad (33)$$

Applying (33), we rewrite (32) as

$$\mathbb{E}[R(T)] \leq \frac{S_\delta}{V_\delta} DC \sqrt{\zeta(\kappa, D)T} + 3\delta LT + 2\tau CT + 2\delta\rho LT.$$

By Lemma 1,

$$\frac{S_\delta}{V_\delta} \leq \frac{n}{\delta} + n\kappa\delta = \frac{n}{\delta} + B\delta.$$

Then

$$\mathbb{E}[R(T)] \leq \left(\frac{n}{\delta} + B\delta\right) DC \sqrt{\zeta(\kappa, D)T} + 3\delta LT + 2\tau CT + 2\delta\rho LT. \quad (34)$$

Taking  $\tau = \frac{\delta}{r}$ ,  $\Delta = BCD\sqrt{\zeta(\kappa, D)} + 3L + 2C/r$  and  $\delta = T^{-\frac{1}{4}}\sqrt{\frac{CDr\sqrt{\zeta(\kappa, D)}}{\Delta}}$ , we have,

$$\begin{aligned} \mathbb{E}[R(T)] &\leq \frac{n}{\delta} DC \sqrt{\zeta(\kappa, D)T} + B\delta DC \sqrt{\zeta(\kappa, D)T} + 3\delta LT + 2\tau CT + 2\delta\rho LT \\ &\leq \frac{n}{\delta} DC \sqrt{\zeta(\kappa, D)T} + (B\delta DC \sqrt{\zeta(\kappa, D)} + 3\delta L + 2\tau C)T + 2\delta\rho LT, \\ &= 2T^{\frac{3}{4}}\sqrt{nCD\sqrt{\zeta(\kappa, D)}}\left(\sqrt{\Delta} + \frac{2\rho L}{\sqrt{\Delta}}\right). \end{aligned}$$

Also with  $\Lambda = \sqrt{\Delta} + \frac{2\rho L}{\sqrt{\Delta}}$ , we get

$$\mathbb{E}[R(T)] \leq 2T^{\frac{3}{4}}\sqrt{nCD\sqrt{\zeta(\kappa, D)}}\Lambda,$$

which completes our proof.  $\square$

## References

- [1] Werner Ballmann. *Lectures on spaces of nonpositive curvature*, volume 25. Birkhäuser, 2012.
- [2] Valerii Berestovskii and Yurii Nikonorov. *Riemannian manifolds and homogeneous geodesics*. Springer, 2020.
- [3] Manfredo Perdigao do Carmo. *Riemannian geometry*. Birkhäuser, 1992.
- [4] Nicolo Cesa-Bianchi and Gábor Lugosi. *Prediction, learning, and games*. Cambridge university press, 2006.
- [5] Shiing-Shen Chern, Weihuan Chen, and Kai Shue Lam. *Lectures on differential geometry*, volume 1. World Scientific, 1999.
- [6] John M Lee. *Introduction to Riemannian manifolds*. Springer, 2018.
- [7] Katsumi Nomizu. On local and global existence of killing vector fields. *Annals of Mathematics*, 72(1):105–120, 1960.
- [8] Hongyi Zhang and Suvrit Sra. First-order methods for geodesically convex optimization. In *Conference on Learning Theory*, pages 1617–1638, 2016.
